# Supplementary material
Source: PubMed Central journal article supplement (PMC6205193)
Supplement: NIHMS980134-supplement-Change_of_Authorship_form.pdf [file NIHMS980134-supplement-Change_of_Authorship_form.pdf]

## Change of Authorship Form

(Must be completed and signed by ALL authors)

Please check all that apply

New author(s) have been added (in addition to this form, all new authors must complete the copyright transfer agreement and conflict of interest disclosure.

Change in order of authorship.

An author wishes to remove his/her name. An author's name may only be removed his/her own request and a letter signed by the author should accompany this form

Manuscript Number STROKE/2018/021179 \_\_\_\_\_

Manuscript Title Synergistic interaction between zinc and reactive oxygen species amplifies ischemic brain injury in rats

### Former Authorship

Please list ALL AUTHORS in the same order as the original submission. For more than 12, use an extra sheet.

#### Print Name

Name (1) Yongmei Zhao  
Name (2) Feng Yan  
Name (3) Jie Yin  
Name (4) Rong Pan  
Name (5) Wenjuan Shi  
Name (6) Zhifeng Qi

#### Print Name

Name (7) Yalan Fang  
Name (8) Sen Li  
Name (9) Yumin Luo  
Name (10) Xunming Ji  
Name (11) Ke Jian Liu  
Name (12) \_\_\_\_\_

### New Authorship

All authors must sign below agreeing to the changes in authorship. The authorship order must reflect the authorship order of the manuscript.

|                              |                               |                          |
|------------------------------|-------------------------------|--------------------------|
| Name (1) <u>Yongmei Zhao</u> | Signature <u>Yongmei Zhao</u> | Date <u>July 4, 2018</u> |
| Name (2) <u>Feng Yan</u>     | Signature <u>Feng Yan</u>     | Date <u>July 5, 2018</u> |
| Name (3) <u>Jie Yin</u>      | Signature <u>Jie Yin</u>      | Date <u>07/05/2018</u>   |
| Name (4) <u>Rong Pan</u>     | Signature <u>Rong Pan</u>     | Date <u>7/5/2018</u>     |
| Name (5) <u>Wenjuan Shi</u>  | Signature <u>Wenjuan Shi</u>  | Date <u>July 4, 2018</u> |
| Name (6) <u>Zhifeng Qi</u>   | Signature <u>zhifeng Qi</u>   | Date <u>July 4, 2018</u> |
| Name (7) <u>Yalan Fang</u>   | Signature <u>Yalan Fang</u>   | Date <u>07/05/2018</u>   |
| Name (8) <u>Yuyou Huang</u>  | Signature <u>Yuyou Huang</u>  | Date <u>July 4, 2018</u> |
| Name (9) <u>Sen Li</u>       | Signature <u>Sen Li</u>       | Date <u>07/05/2018</u>   |
| Name (10) <u>Yumin Luo</u>   | Signature <u>y lu</u>         | Date <u>07/05/2018</u>   |
| Name (11) <u>Xunming Ji</u>  | Signature <u>Xunming Ji</u>   | Date <u>07/04/2018</u>   |
| Name (12) <u>Ke Jian Liu</u> | Signature <u>Ke Jian Liu</u>  | Date <u>7/4/2018</u>     |

Please scan and email to [stroke@strokeahajournal.org](mailto:stroke@strokeahajournal.org).
